# Supplementary material for: Beyond the Traditional Mountain Emmental Cheese in “Ţara Dornelor”, Romania: Consumer and Producer Profiles, and Product Sensory Characteristics
Source: MDPI journal article supplement (doi:10.3390/agriculture14040621), 2024-04-16
Supplement: s1 [file s1]

## SUPPLEMENTARY MATERIAL

**Table S1. Consumer questionnaire items**

| I. DEMOGRAPHIC CHARACTERISTICS          |                    |                  |                      |  |
|-----------------------------------------|--------------------|------------------|----------------------|--|
| <b>1. Gender:</b> a. male               | b. female          | c. neuter        |                      |  |
| <b>2. Age:</b> a. < 18 years            | b. 18-40 years     | c. 41-60 years   | d. > 60 years        |  |
| <b>3. Monthly income:</b> a. < 1800 lei | b. 1800-3000 lei   | c. 3000-5000 lei | d. >5000 lei         |  |
| <b>4. Education:</b> a. no education    | b. primary/general | c. high school   | d. University degree |  |
| <b>5. Family members:</b> a. 1 member   | b. 2 members       | c. 3-5 members   | d. >5 members        |  |
| <b>6. Occupation</b> .....              |                    |                  |                      |  |

  

| II. SWISS CHEESE CONSUMPTION                                                                   |                            |                        |                |              |
|------------------------------------------------------------------------------------------------|----------------------------|------------------------|----------------|--------------|
| <b>1. Are you a Swiss cheese consumer? (if the answer is no, the questionnaire ends here):</b> |                            |                        |                |              |
| YES                                                                                            |                            | NO                     |                |              |
| <b>2. How often do you eat Swiss cheese?</b>                                                   |                            |                        |                |              |
| a. once a week                                                                                 | b. once a month            | c. sometimes in a year | d. once a yeas | e. never     |
| <b>3. How important are the following aspects when buying a type of Swiss cheese?</b>          |                            |                        |                |              |
| <b>3.1. price:</b>                                                                             |                            |                        |                |              |
| a. not at all                                                                                  | b. a little                | c. neutral             | d. much        | e. very much |
| <b>3.2. taste and flavor:</b>                                                                  |                            |                        |                |              |
| a. not at all                                                                                  | b. a little                | c. neutral             | d. much        | e. very much |
| <b>3.3. appearance/texture:</b>                                                                |                            |                        |                |              |
| a. not at all                                                                                  | b. a little                | c. neutral             | d. much        | e. very much |
| <b>3.4. producer:</b>                                                                          |                            |                        |                |              |
| a. not at all                                                                                  | b. a little                | c. neutral             | d. much        | e. very much |
| <b>3.5. product history:</b>                                                                   |                            |                        |                |              |
| a. not at all                                                                                  | b. a little                | c. neutral             | d. much        | e. very much |
| <b>3.6. benefits for health</b>                                                                |                            |                        |                |              |
| a. not at all                                                                                  | b. a little                | c. neutral             | d. much        | e. very much |
| <b>3.7. mood</b>                                                                               |                            |                        |                |              |
| a. not at all                                                                                  | b. a little                | c. neutral             | d. much        | e. very much |
| <b>3.8. ingredients</b>                                                                        |                            |                        |                |              |
| a. not at all                                                                                  | b. a little                | c. neutral             | d. much        | e. very much |
| <b>3.9. product notoriety and advertising</b>                                                  |                            |                        |                |              |
| a. not at all                                                                                  | b. a little                | c. neutral             | d. much        | e. very much |
| <b>3.10. commodity</b>                                                                         |                            |                        |                |              |
| a. not at all                                                                                  | b. a little                | c. neutral             | d. much        | e. very much |
| <b>3.11. nutritional value</b>                                                                 |                            |                        |                |              |
| a. not at all                                                                                  | b. a little                | c. neutral             | d. much        | e. very much |
| Others.....                                                                                    |                            |                        |                |              |
| <b>4. How much Swiss cheese do you usually buy?</b>                                            |                            |                        |                |              |
| a. I don't buy                                                                                 | b. 100-200 g               | c. 200-500 g           | d. 0.5-1 kg    | e. > 1kg     |
| <b>5. How much would you be willing to pay for 1 kg of Swiss cheese?</b>                       |                            |                        |                |              |
| a. < 50 lei                                                                                    | b. 50-75 lei               | c. 75-100 lei          | d. 100-125 lei | e. >125 lei  |
| <b>6. Where do you prefer to buy Swiss cheese?</b>                                             |                            |                        |                |              |
| a. Agro-food market                                                                            | b. supermarket/hypermarket | c. local store         | d. dairy store |              |
| e. particular houses                                                                           | f. online                  |                        |                |              |

Table S2. Producer questionnaire items

|                                                                                                                      |             |            |         |              |
|----------------------------------------------------------------------------------------------------------------------|-------------|------------|---------|--------------|
| <b>1. What year did you start the production of Swiss cheese? Were there any discontinuities during this period?</b> |             |            |         |              |
| <b>2. What is the current production volume?</b>                                                                     |             |            |         |              |
| <b>3. Do you want to expand your business? If so, how exactly?</b>                                                   |             |            |         |              |
| <b>4. What are the points of sale of the Swiss product you sell?</b>                                                 |             |            |         |              |
| <b>5. List the most important difficulties encountered in the production of Swiss cheese.</b>                        |             |            |         |              |
| <b>6. How important are the following aspects related to the production and the Swiss:</b>                           |             |            |         |              |
| <b>6.1. hygienic-sanitary / physico-chemical parameters of the raw materials</b>                                     |             |            |         |              |
| a. not at all                                                                                                        | b. a little | c. neutral | d. much | e. very much |
| <b>6.2. staff training</b>                                                                                           |             |            |         |              |
| a. not at all                                                                                                        | b. a little | c. neutral | d. much | e. very much |
| <b>6.3. equipment</b>                                                                                                |             |            |         |              |
| a. not at all                                                                                                        | b. a little | c. neutral | d. much | e. very much |
| <b>6.4. the quality of packaging and auxiliary materials</b>                                                         |             |            |         |              |
| a. not at all                                                                                                        | b. a little | c. neutral | d. much | e. very much |
| <b>6.5. hygiene</b>                                                                                                  |             |            |         |              |
| a. not at all                                                                                                        | b. a little | c. neutral | d. much | e. very much |
| <b>6.6. raw materials availability</b>                                                                               |             |            |         |              |
| a. not at all                                                                                                        | b. a little | c. neutral | d. much | e. very much |
| <b>6.7. origin of raw materials</b>                                                                                  |             |            |         |              |
| a. not at all                                                                                                        | b. a little | c. neutral | d. much | e. very much |
| <b>6.8. utilities</b>                                                                                                |             |            |         |              |
| a. not at all                                                                                                        | b. a little | c. neutral | d. much | e. very much |
| <b>6.9. environmental protection</b>                                                                                 |             |            |         |              |
| a. not at all                                                                                                        | b. a little | c. neutral | d. much | e. very much |
| <b>6.10. legislation</b>                                                                                             |             |            |         |              |
| a. not at all                                                                                                        | b. a little | c. neutral | d. much | e. very much |
| Others .....                                                                                                         |             |            |         |              |
| <b>7. How important are the following aspects related to the marketing of Swiss cheese:</b>                          |             |            |         |              |
| <b>7.1. advertising</b>                                                                                              |             |            |         |              |
| a. not at all                                                                                                        | b. a little | c. neutral | d. much | e. very much |
| <b>7.2. taste and flavor</b>                                                                                         |             |            |         |              |
| a. not at all                                                                                                        | b. a little | c. neutral | d. much | e. very much |
| <b>7.3. nutritional value</b>                                                                                        |             |            |         |              |
| a. not at all                                                                                                        | b. a little | c. neutral | d. much | e. very much |
| <b>7.4. appearance and texture</b>                                                                                   |             |            |         |              |
| a. not at all                                                                                                        | b. a little | c. neutral | d. much | e. very much |
| <b>7.5. quality label</b>                                                                                            |             |            |         |              |
| a. not at all                                                                                                        | b. a little | c. neutral | d. much | e. very much |
| <b>7.6. product notoriety</b>                                                                                        |             |            |         |              |
| a. not at all                                                                                                        | b. a little | c. neutral | d. much | e. very much |
| <b>7.7. availability and access for consumers</b>                                                                    |             |            |         |              |
| a. not at all                                                                                                        | b. a little | c. neutral | d. much | e. very much |
| <b>7.8. price</b>                                                                                                    |             |            |         |              |
| a. not at all                                                                                                        | b. a little | c. neutral | d. much | e. very much |
| <b>7.9. ingredients</b>                                                                                              |             |            |         |              |
| a. not at all                                                                                                        | b. a little | c. neutral | d. much | e. very much |
| <b>7.10. product history</b>                                                                                         |             |            |         |              |
| a. not at all                                                                                                        | b. a little | c. neutral | d. much | e. very much |
| Others .....                                                                                                         |             |            |         |              |
| <b>8. What is the average daily amount of Swiss cheese sold?</b>                                                     |             |            |         |              |

**Table S3.** Description of the sensory analysis scale

| Characteristic                                 | Score | Description                                                                                                                                                                                                                                                                               |
|------------------------------------------------|-------|-------------------------------------------------------------------------------------------------------------------------------------------------------------------------------------------------------------------------------------------------------------------------------------------|
| Appearance and shape<br>- crust;<br>- section. | 5     | - Smooth, uniform, yellowish crust, without cracks.<br>- Uniform fermentation meshes, of different sizes, smooth and shiny meshes inside, large fermentation meshes predominate, under the crust there is a compact area of about 2 cm.                                                   |
|                                                | 4     | - Smooth, slightly thickened, uniform crust, yellow to brown in color, 1-2 cracks not penetrating the core and not covered by mold.<br>- More numerous meshes, unevenly distributed pattern starting closer to the crust, with elongated holes.                                           |
|                                                | 3     | - Yellow or brown crust, superficial cracks not covered by mold and not penetrated into the core, small bumps on the surface.<br>- Several meshes, of different sizes, some joined together or poor in design, meshes with a walnut crust appearance.                                     |
|                                                | 2     | - Rough crust, yellow in color, not attacked by pests, bumps / chamfers / deep cracks, no black mold, no holes.<br>- Small, many and dense meshes, with different format (oval, fringed, walnut shell), united meshes that form a pattern that is too large, with cracks or rare caverns. |
|                                                | 1     | - Rough or slightly wet crust, with spots of a different color, frequent deep cracks, with holes caused by pests, rotten areas, detached bark, with mold.<br>- Paste without fermentation voids or spongy, ballooned, with several caverns, with large and dense cracks.                  |
| Color                                          | 5     | Straw yellow to yellow, uniform, with a darker shade towards the crust.                                                                                                                                                                                                                   |
|                                                | 4     | With small deviations from the specification, with a darker shade towards the crust on a larger portion, rare small white dots, without impurities, are allowed.                                                                                                                          |
|                                                | 3     | Yellow to grey, slightly marbled, small brown dots (colonies of propionic bacteria) are allowed.                                                                                                                                                                                          |
|                                                | 2     | Chalky white, dirty yellow-gray, marbled, with spots around the cracks.                                                                                                                                                                                                                   |
|                                                | 1     | Uneven, intensely marbled, with brown, greenish, reddish spots.                                                                                                                                                                                                                           |
| Consistency                                    | 5     | Elastic, homogeneous, non-crumbling paste, when masticated it should not be hard and should melt in the mouth.                                                                                                                                                                            |
|                                                | 4     | Slightly inelastic, slightly rubbery or slightly crumbly, denser paste.                                                                                                                                                                                                                   |
|                                                | 3     | Crumbly, slightly sandy, floury, hard, dry paste.                                                                                                                                                                                                                                         |
|                                                | 2     | Hard, chalky, sandy or too soft, slightly sticky paste, with fat removal.                                                                                                                                                                                                                 |
|                                                | 1     | Very dry, very hard or very soft, very sticky paste.                                                                                                                                                                                                                                      |
| Smell                                          | 5     | Pleasant, with a well-expressed specific aroma, without extraneous nuances.                                                                                                                                                                                                               |
|                                                | 4     | Pleasant, less expressed aroma, without extraneous nuances, slightly sour.                                                                                                                                                                                                                |
|                                                | 3     | Weak aroma, with a slight smell of yeast, sour.                                                                                                                                                                                                                                           |
|                                                | 2     | Unflavored, with slight foreign nuances, slightly rancid, sour, from yeasts, from butyric fermentation.                                                                                                                                                                                   |
|                                                | 1     | Non-specific, rancid, foreign fermentations.                                                                                                                                                                                                                                              |
| Taste                                          | 5     | Pleasant, slightly sweet, with the characteristic aroma of walnut kernels, without any foreign taste.                                                                                                                                                                                     |
|                                                | 4     | Slightly highlighted, slightly salty, slightly sour, slightly bland.                                                                                                                                                                                                                      |
|                                                | 3     | Bland, slightly willowy, too salty, slightly spicy, slightly yeasty, slightly foraged, slightly cloying, slightly oxidized, slightly smoky, slightly bitter, sour.                                                                                                                        |
|                                                | 2     | Slightly non-specific, willowy, spicy, yeasty, foraged, smoky, bitter, rancid, slightly musty.                                                                                                                                                                                            |
|                                                | 1     | Non-specific, very rancid, slightly rotten, easy to soap, very sour, strong fodder, bitter, moldy.                                                                                                                                                                                        |
